# Supplementary material for: A mechanical transition from tension to buckling underlies the jigsaw puzzle shape morphogenesis of histoblasts in the Drosophila epidermis
Source: PubMed Central journal article supplement (PMC11175506; doi:10.1371/journal.pbio.3002662), 2024-06-13
Supplement: pbio.3002662.s001.pdf [file pbio.3002662.s001.pdf]

## S1 text : Supplementary Tables

Table A: Statistical tests for pair-wise comparison of the distributions presented in Fig 1.

Table B: Normality test for parameter distributions in Fig 1.

Table C: Statistical tests of the results presented in Fig 3.

Table D,E: Statistical tests relative to the results shown in Fig 7.

Table F: Statistical tests relative to the results shown in Fig S7. H and  $p$ -values reported were calculated by Mann-Whitney U test.

**Table A.** Statistical tests for pair-wise comparison of the distributions presented in Fig 1. The table reports the H and *p* values for a Mann-Whitney U test at 0.05 confidence. Samples are numbered according to their age, in h AEL (hours after egg laying). In red, are the conditions for which the *p*-value is higher than the standard 0.05. wp = white pupa, perim = perimeter, circ = circularity

| <b>Mann-Whitney U test - H</b> |              |               |                |              |           |
|--------------------------------|--------------|---------------|----------------|--------------|-----------|
|                                | Area - < 90h | Area - 90-95h | Area - 95-100h | Area - >100h | Area - wp |
| Area - < 90h                   | 0            |               |                |              |           |
| Area - 90-95h                  | 0            | 0             |                |              |           |
| Area - 95-100h                 | 1            | 0             | 0              |              |           |
| Area - > 100h                  | 1            | 1             | 1              | 0            |           |
| Area - wp                      | 1            | 1             | 1              | 1            | 0         |

  

| <b>Mann-Whitney U test - p</b> |              |               |                |              |           |
|--------------------------------|--------------|---------------|----------------|--------------|-----------|
|                                | Area - < 90h | Area - 90-95h | Area - 95-100h | Area - >100h | Area - wp |
| Area - < 90h                   | 1            |               |                |              |           |
| Area - 90-95h                  | 4,47E-01     | 1             |                |              |           |
| Area - 95-100h                 | 2,68E-02     | 6,85E-02      | 1              |              |           |
| Area - > 100h                  | 3,95E-24     | 2,02E-30      | 7,02E-20       | 1            |           |
| Area - wp                      | 5,16E-24     | 2,97E-27      | 1,49E-21       | 1,68E-07     | 1         |

  

| <b>Mann-Whitney U test - H</b> |               |                |                 |               |            |
|--------------------------------|---------------|----------------|-----------------|---------------|------------|
|                                | Perim - < 90h | Perim - 90-95h | Perim - 95-100h | Perim - >100h | Perim - wp |
| Perim - < 90h                  | 0             |                |                 |               |            |
| Perim - 90-95h                 | 1             | 0              |                 |               |            |
| Perim - 95-100h                | 1             | 0              | 0               |               |            |
| Perim - > 100h                 | 1             | 1              | 1               | 0             |            |
| Perim - wp                     | 1             | 1              | 1               | 1             | 0          |

  

| <b>Mann-Whitney U test - p</b> |               |                |                 |               |            |
|--------------------------------|---------------|----------------|-----------------|---------------|------------|
|                                | Perim - < 90h | Perim - 90-95h | Perim - 95-100h | Perim - >100h | Perim - wp |
| Perim - < 90h                  | 1             |                |                 |               |            |
| Perim - 90-95h                 | 1,43E-04      | 1              |                 |               |            |
| Perim - 95-100h                | 3,92E-04      | 8,53E-01       | 1               |               |            |
| Perim - > 100h                 | 8,59E-30      | 7,08E-29       | 2,07E-27        | 1             |            |
| Perim - wp                     | 1,51E-07      | 1,63E-04       | 2,69E-04        | 1,43E-05      | 1          |

  

| <b>Mann-Whitney U test - H</b> |              |               |                |              |           |
|--------------------------------|--------------|---------------|----------------|--------------|-----------|
|                                | Circ - < 90h | Circ - 90-95h | Circ - 95-100h | Circ - >100h | Circ - wp |
| Circ - < 90h                   | 0            |               |                |              |           |
| Circ - 90-95h                  | 1            | 0             |                |              |           |
| Circ - 95-100h                 | 1            | 1             | 0              |              |           |
| Circ - > 100h                  | 1            | 1             | 1              | 0            |           |
| Circ - wp                      | 1            | 1             | 1              | 1            | 0         |

  

| <b>Mann-Whitney U test - p</b> |              |               |                |              |           |
|--------------------------------|--------------|---------------|----------------|--------------|-----------|
|                                | Circ - < 90h | Circ - 90-95h | Circ - 95-100h | Circ - >100h | Circ - wp |
| Circ - < 90h                   | 1            |               |                |              |           |
| Circ - 90-95h                  | 6,76E-12     | 1             |                |              |           |
| Circ - 95-100h                 | 6,53E-21     | 1,36E-03      | 1              |              |           |
| Circ - > 100h                  | 3,06E-65     | 1,97E-68      | 5,96E-65       | 1            |           |
| Circ - wp                      | 2,89E-31     | 4,13E-31      | 2,13E-30       | 1,54E-02     | 1         |

**Table B.** Normality test for parameter distributions in Fig 1. Samples are numbered according to their age, in h AEL (hours after egg laying). wp = white pupa, perim = perimeter, circ = circularity

|                | Lilliefors test |          | Anderson-Darling test |          |
|----------------|-----------------|----------|-----------------------|----------|
|                | H               | <i>p</i> | H                     | <i>p</i> |
| Area - < 90h   | 0               | 1,91E-01 | 1                     | 1,73E-02 |
| Area - 90-95h  | 1               | 1,15E-02 | 1                     | 4,35E-03 |
| Area - 95-100h | 1               | 1,00E-03 | 1                     | 5,00E-04 |
| Area - > 100h  | 1               | 1,00E-03 | 1                     | 5,00E-04 |
| Area - wp      | 1               | 3,96E-02 | 1                     | 1,65E-03 |
| Perim- < 90h   | 0               | 1,66E-01 | 0                     | 7,95E-02 |
| Perim- 90-95h  | 1               | 3,88E-02 | 0                     | 2,16E-01 |
| Perim- 95-100h | 1               | 1,00E-03 | 1                     | 5,00E-04 |
| Perim- > 100h  | 1               | 1,00E-03 | 1                     | 5,00E-04 |
| Perim- wp      | 0               | 6,87E-02 | 1                     | 3,85E-03 |
| Circ - < 90h   | 0               | 5,00E-01 | 0                     | 7,02E-01 |
| Circ - 90-95h  | 0               | 1,60E-01 | 0                     | 9,65E-02 |
| Circ - 95-100h | 1               | 1,00E-03 | 1                     | 5,00E-04 |
| Circ - > 100h  | 1               | 1,00E-03 | 1                     | 5,00E-04 |
| Circ - wp      | 1               | 1,00E-03 | 1                     | 5,00E-04 |

**Table C.** Statistical tests of the results presented in Fig 3. H and *p*-values reported were calculated by Mann-Whitney U test. wt: wild type; wwt: with respect to;

|          | median | Area - H<br>wrt wt | Area - p<br>wrt wt |
|----------|--------|--------------------|--------------------|
| wt       | 135,30 |                    |                    |
| Rab11    | 50,12  | 1                  | 1,67E-26           |
| Stg      | 20,06  | 1                  | 1,11E-137          |
| Cad-RNAi | 138,22 | 0                  | 1,94E-1            |

  

|          | median | Perim - H<br>wrt wt | Perim - p<br>wrt wt |
|----------|--------|---------------------|---------------------|
| wt       | 99,69  |                     |                     |
| Rab11    | 30,01  | 1                   | 3,80E-32            |
| Stg      | 18,56  | 1                   | 2,14E-143           |
| Cad-RNAi | 52,43  | 1                   | 7,3E-19             |

  

|          | median | Circ - H<br>wrt wt | Circ - p<br>wrt wt |
|----------|--------|--------------------|--------------------|
| wt       | 0,17   |                    |                    |
| Rab11    | 0,74   | 1                  | 4,01E-38           |
| Stg      | 0,75   | 1                  | 4,57E-145          |
| Cad-RNAi | 0,62   | 1                  | 5,2E-25            |

**Table D.** Statistical tests relative to the results shown in Fig 7. H and *p*-values reported were calculated by Mann-Whitney U test. wt: wild type; wrt: with respect to

|           | median | Area - H<br>wrt wt | Area - p<br>wrt wt |
|-----------|--------|--------------------|--------------------|
| wt        | 135,30 |                    |                    |
| InR-DN    | 181,88 | 1                  | 2,48E-02           |
| TSC1-RNAi | 87,51  | 1                  | 3,60E-08           |

**Table E.** Statistical tests corresponding to the data shown in Fig 7D. H and *p*-values reported were calculated by Mann-Whitney U test.

|                         | WT         | InRdn       | TSC1       |
|-------------------------|------------|-------------|------------|
| Area (µm <sup>2</sup> ) | 1.5004E+03 | 1.0042 E+03 | 1.8567E+03 |
| p (Mann-Whitney) vs WT  |            | 0,0142      | 0,0228     |

**Table F.** Statistical tests relative to the results shown in Fig S7. H and *p*-values reported were calculated by Mann-Whitney U test.

|      | median |          | wt_wp VS InRdn_wp |          |
|------|--------|----------|-------------------|----------|
|      | wt     | InRdn    | H                 | p        |
| area | 88,29  | 155,71   | 1                 | 1,32E-07 |
| circ | 0,22   | 2,78E-01 | 1                 | 9,77E-04 |
